# Supplementary material
Source: publisher figshare collection journal article supplement (https://diabetesjournals.figshare.com/ndownloader/files/26448803)
Supplement: Supplementary file 1 [file 26448803]

## Supplementary materials

### Alcohol abstinence and the risk of atrial fibrillation in patients with newly diagnosed type 2 diabetes mellitus: a nationwide population-based study

**Short title:** Alcohol abstinence and the risk of atrial fibrillation

You-jung Choi, MD<sup>1\*</sup>, Kyung-Do Han, PhD<sup>2\*</sup>, Eue-Keun Choi, MD, PhD<sup>1,3</sup>, Jin-Hyeong Jung<sup>4</sup>, So-Ryoung Lee, MD, PhD<sup>1</sup>, Seil Oh, MD, PhD<sup>1,3</sup>, Gregory Y. H. Lip, MD, PhD<sup>3,5,6</sup>

<sup>1</sup>Department of Internal Medicine, Seoul National University Hospital, 101, Daehak-ro, Jongno-gu, Seoul, Republic of Korea, 03080

<sup>2</sup>Department of Statistics and Actuarial Science, Soongsil University, Seoul, Republic of Korea

<sup>3</sup>Department of Internal Medicine, Seoul National University College of Medicine, Seoul, Republic of Korea

<sup>4</sup>Department of Biostatistics, The Catholic University of Korea, Seoul, Korea

<sup>5</sup>Liverpool Centre for Cardiovascular Science, University of Liverpool and Liverpool Chest & Heart Hospital, Liverpool, United Kingdom; and <sup>6</sup>Department of Clinical Medicine, Aalborg University, Aalborg, Denmark

\*Two authors contributed equally.

#### Corresponding Author:

Eue-Keun Choi, MD, PhD

Department of Internal Medicine, Seoul National University Hospital, 101 Daehak-ro, Jongno-gu, Seoul, 03080, Republic of Korea

Phone +82-2-2072-0688/Fax +82-2-762-9662/E-mail: choiek17@snu.ac.kr

**Supplementary Table S1.** Definition of comorbidities

| <b>Diagnosis</b>                 | <b>ICD 10th Revision-Clinical Modification code and definition</b>                                                                                                                                                                           | <b>Diagnostic definition</b>                                                       |
|----------------------------------|----------------------------------------------------------------------------------------------------------------------------------------------------------------------------------------------------------------------------------------------|------------------------------------------------------------------------------------|
| <b>Congestive heart failure</b>  | I50                                                                                                                                                                                                                                          | -                                                                                  |
| <b>Hypertension</b>              | I10-I13, I15 and minimum 1 prescription of anti-hypertensive drug (thiazide, loop diuretics, aldosterone antagonist, alpha-/beta-blocker, calcium-channel blocker, angiotensin-converting enzyme inhibitor, angiotensin II receptor blocker) | Systolic blood pressure $\geq$ 140 mmHg or Diastolic blood pressure $\geq$ 90 mmHg |
| <b>Dyslipidemia</b>              | E78 and minimum 1 prescription of lipid-lowering drug                                                                                                                                                                                        | Fasting total cholesterol $\geq$ 240 mg/dl                                         |
| <b>Stroke</b>                    | I63, I64                                                                                                                                                                                                                                     | -                                                                                  |
| <b>Transit ischemic attack</b>   | G458, G459                                                                                                                                                                                                                                   | -                                                                                  |
| <b>Thromboembolism</b>           | I74, I26, I802                                                                                                                                                                                                                               | -                                                                                  |
| <b>Peripheral artery disease</b> | I70, I73                                                                                                                                                                                                                                     | -                                                                                  |
| <b>Myocardial infarction</b>     | I21, I22                                                                                                                                                                                                                                     | -                                                                                  |

ICD indicates International Classification of Disease.

**Supplementary Table S2.** Baseline characteristics according to the amount of alcohol consumption before the first diagnosis type 2 diabetes mellitus.

| Variables                          | Amount of alcohol consumption |                                       |                                                |
|------------------------------------|-------------------------------|---------------------------------------|------------------------------------------------|
|                                    | Non-drinkers                  | Mild alcohol consumption (< 20 g/day) | Moderate-Heavy alcohol consumption (≥20 g/day) |
| Number, n (%)                      | 112271 (64.1)                 | 42020 (24.0)                          | 20809 (11.9)                                   |
| Age, years                         | 63.4 ± 10.6                   | 57.3 ± 11.5                           | 56.3 ± 10.8                                    |
| < 65 years-old, n (%)              | 58924 (52.5)                  | 30694 (73.05)                         | 16289 (78.3)                                   |
| 65-75 years-old, n (%)             | 37987 (33.8)                  | 8928 (21.3)                           | 3663 (17.6)                                    |
| ≥ 75 years-old, n (%)              | 15360 (13.7)                  | 2398 (5.7)                            | 857 (4.1)                                      |
| Male sex, n (%)                    | 36263 (32.3)                  | 32333 (77.0)                          | 19650 (94.4)                                   |
| Body mass index, kg/m <sup>2</sup> | 25.1 ± 3.52                   | 25.3 ± 3.4                            | 25.5 ± 3.43                                    |
| BP measurements                    |                               |                                       |                                                |
| Systolic BP, mmHg                  | 126.7 ± 14.8                  | 125.9 ± 14.0                          | 127.9 ± 14.1                                   |
| Diastolic BP, mmHg                 | 77.0 ± 9.5                    | 78.0 ± 9.5                            | 79.5 ± 9.6                                     |
| Comorbidities, n (%)               |                               |                                       |                                                |
| Congestive heart failure           | 4843 (4.3)                    | 1086 (2.6)                            | 469 (2.3)                                      |
| Hypertension                       | 24284 (21.6)                  | 8324 (19.8)                           | 5031 (24.2)                                    |
| Dyslipidaemia                      | 67820 (60.4)                  | 23408 (55.7)                          | 11325 (54.4)                                   |
| stroke/transit ischaemic attack    | 4972 (4.5)                    | 1420 (3.4)                            | 684 (3.3)                                      |
| Thromboembolism                    | 964 (0.9)                     | 290 (0.69)                            | 131 (0.6)                                      |
| Peripheral artery disease          | 23276 (20.7)                  | 6443 (15.3)                           | 3184 (15.3)                                    |
| Myocardial infarction              | 2090 (1.9)                    | 708 (1.7)                             | 307 (1.5)                                      |
| Triglyceride, mg/dL                | 35.3 ± 44.5                   | 53.5 ± 67.3                           | 90.0 ± 114.8                                   |
| Serum glucose, mg/dL               | 112.3 ± 26.3                  | 116.2 ± 30.4                          | 119.5 ± 32.0                                   |
| Aspartate aminotransferase, U/L    | 28.4 ± 24.1                   | 30.1 ± 21.7                           | 35.5 ± 42.4                                    |
| Alanine aminotransferase, U/L      | 28.7 ± 29.2                   | 32.8 ± 28.0                           | 36.1 ± 42.9                                    |
| Smoking status, n (%)              |                               |                                       |                                                |
| Never                              | 87834 (78.2)                  | 17535 (41.7)                          | 4914 (23.6)                                    |
| Ex-smoker                          | 14213 (12.7)                  | 13153 (31.3)                          | 7384 (35.5)                                    |
| Current smoker                     | 10224 (9.1)                   | 11332 (27.0)                          | 8511 (40.9)                                    |
| Low income, n (%)                  | 24553(21.9)                   | 7921(18.9)                            | 3785 (18.2)                                    |
| Regular physical activity, n (%)   | 23303(20.8)                   | 10742(25.6)                           | 4892 (23.5)                                    |
| Insulin user, n (%)                | 15377 (13.7)                  | 6048 (14.4)                           | 3122 (15.0)                                    |
| Oral hypoglycemic agent, n (%)     |                               |                                       |                                                |
| Single                             | 72518 (64.6)                  | 26456 (63.0)                          | 12979 (62.4)                                   |
| Dual combination                   | 29456 (26.2)                  | 11445 (27.2)                          | 5749 (27.6)                                    |

|                                                    |              |              |             |
|----------------------------------------------------|--------------|--------------|-------------|
| Triple combination                                 | 10297 (9.2)  | 4119 (9.8)   | 2081 (10.0) |
| CHA <sub>2</sub> DS <sub>2</sub> -VAS score, point | 2.87 ± 1.28  | 2.02 ± 1.08  | 1.82 ± 0.98 |
| ≥3 points, n (%)                                   | 62187 (55.4) | 11189 (26.6) | 4172 (20.1) |
| CHA <sub>2</sub> DS <sub>2</sub> -VAS score, n (%) |              |              |             |
| 1                                                  | 13533 (12.1) | 15890 (37.8) | 9814 (47.2) |
| 2                                                  | 36551 (32.6) | 14941 (35.6) | 6823 (32.8) |
| 3                                                  | 30764 (27.4) | 7163 (17.1)  | 2878 (13.8) |
| 4                                                  | 19047 (17.0) | 2740 (6.5)   | 920 (4.4)   |
| 5                                                  | 8574 (7.6)   | 938 (2.2)    | 263 (1.3)   |
| 6                                                  | 2835 (2.5)   | 290 (0.69)   | 91 (0.44)   |
| 7                                                  | 760 (0.68)   | 50 (0.12)    | 18 (0.09)   |
| 8                                                  | 194 (0.17)   | 8 (0.02)     | 2 (0.01)    |
| 9                                                  | 13 (0.01)    | 0 (0)        | 0 (0)       |

All variables were significantly different among the groups (All  $p < 0.001$ ).

BP indicates blood pressure. The CHA<sub>2</sub>DS<sub>2</sub>-VASc stands for congestive heart failure, hypertension, age (>65 years = 1 point, >75 years = 2 points), DM, previous stroke/transient ischemic attack (2 points), vascular disease (peripheral arterial disease, previous myocardial infarction, aortic atheroma), and sex category (female sex).

**Supplementary Table S3.** The relative risk of atrial fibrillation according to the amount and frequency of alcohol consumption at baseline

| Variables                          | Total  | Atrial       | Follow-up | Unadjusted       | Adjusted (Model 1) | Adjusted (Model 2) |
|------------------------------------|--------|--------------|-----------|------------------|--------------------|--------------------|
|                                    | number | fibrillation | duration* | HR (95% CI)      | HR (95% CI)        | HR (95% CI)        |
| <b>Drinking amount per day</b>     |        |              |           |                  |                    |                    |
| None                               | 112271 | 2782         | 446418    | 1 (Reference)    | 1 (Reference)      | 1 (Reference)      |
| Mild (< 20 g/day)                  | 42020  | 894          | 169904    | 0.84 (0.78–0.91) | 0.99 (0.91–1.07)   | 1.00 (0.92–1.09)   |
| Moderate (20–39 g/day)             | 12581  | 268          | 51338     | 0.84 (0.74–0.95) | 1.06 (0.93–1.21)   | 1.05 (0.92–1.20)   |
| Heavy (≥ 40 g/day)                 | 8228   | 230          | 33113     | 1.11 (0.97–1.27) | 1.24 (1.08–1.43)   | 1.22 (1.06–1.41)   |
| <b>Drinking frequency per week</b> |        |              |           |                  |                    |                    |
| 0                                  | 112271 | 2782         | 446418    | 1 (Reference)    | 1 (Reference)      | 1 (Reference)      |
| 1 or 2 days                        | 39476  | 747          | 160544    | 0.75 (0.69–0.81) | 0.96 (0.88–1.05)   | 0.97 (0.89–1.06)   |
| More than or equal 3 days          | 23353  | 645          | 93810     | 1.10 (1.01–1.20) | 1.13 (1.03–1.24)   | 1.13 (1.03–1.25)   |

\*Follow-up duration present as person-years.

Model 1: adjusted for age and sex.

Model 2: adjusted for age, sex, body mass index, smoking status, regular physical activity, low income, CHA<sub>2</sub>DS<sub>2</sub>-VASc score, hypertension, dyslipidemia, chronic heart failure, peripheral arterial disease, stroke/transit ischemic attack, thromboembolism, the use of insulin, and the number of oral hypoglycemic agents.

**Supplementary Table S4.** Risk of atrial fibrillation according to alcohol consumption behavior change after the first diagnosis of type 2 diabetes mellitus

| Variables         | Total number | AF   | Follow-up duration* | Unadjusted       | Adjusted (Model 1) | Adjusted (Model 2) |
|-------------------|--------------|------|---------------------|------------------|--------------------|--------------------|
|                   |              |      |                     | HR (95% CI)      | HR (95% CI)        | HR (95% CI)        |
| Constant drinkers | 10494        | 260  | 42590               | 1 (Reference)    | 1 (Reference)      | 1 (Reference)      |
| Abstainers        | 10315        | 238  | 41860               | 0.93 (0.78–1.11) | 0.83 (0.69–0.99)   | 0.81 (0.68–0.97)   |
| Non-drinkers      | 102669       | 2560 | 407666              | 1.03 (0.91–1.17) | 0.79 (0.69–0.91)   | 0.80 (0.69–0.92)   |

\*Follow-up duration was presented as person-years.

Model 1: adjusted for age and sex

Model 2: adjusted for age, sex, body mass index, smoking status, regular physical activity, low income, CHA<sub>2</sub>DS<sub>2</sub>-VAS score, hypertension, dyslipidemia, chronic heart failure, peripheral arterial disease, stroke/transit ischemic attack, thromboembolism, the use of insulin, and the number of oral hypoglycemic agents.

AF indicates atrial fibrillation; HR, hazard ratio; CI, confidence interval.



|                       |       |      |        |                  |                  |                  |
|-----------------------|-------|------|--------|------------------|------------------|------------------|
| Constant drinkers     | 3878  | 110  | 15558  | 1 (Reference)    | 1 (Reference)    | 1 (Reference)    |
| Abstainers            | 4126  | 94   | 16523  | 0.81 (0.61–1.06) | 0.71 (0.54–0.94) | 0.69 (0.52–0.91) |
| Non-drinkers          | 43561 | 1089 | 172309 | 0.90 (0.74–1.09) | 0.77 (0.62–0.96) | 0.75 (0.60–0.93) |
| <b>&lt; 25 → ≥ 25</b> |       |      |        |                  |                  |                  |
| Constant drinkers     | 487   | 12   | 1949   | 1 (Reference)    | 1 (Reference)    | 1 (Reference)    |
| Abstainers            | 483   | 13   | 1965   | 1.08 (0.49–2.37) | 1.03 (0.47–2.26) | 1.02 (0.46–2.26) |
| Non-drinkers          | 4309  | 107  | 16936  | 1.03 (0.57–1.87) | 0.78 (0.39–1.54) | 0.78 (0.39–1.54) |
| <b>≥ 25 → &lt; 25</b> |       |      |        |                  |                  |                  |
| Constant drinkers     | 734   | 19   | 3043   | 1 (Reference)    | 1 (Reference)    | 1 (Reference)    |
| Abstainers            | 891   | 16   | 3694   | 0.70 (0.36–1.35) | 0.64 (0.33–1.25) | 0.62 (0.32–1.21) |
| Non-drinkers          | 10074 | 281  | 40221  | 1.12 (0.71–1.79) | 0.98 (0.59–1.61) | 0.95 (0.58–1.57) |
| <b>≥ 25 → ≥ 25</b>    |       |      |        |                  |                  |                  |
| Constant drinkers     | 5395  | 119  | 22040  | 1 (Reference)    | 1 (Reference)    | 1 (Reference)    |
| Abstainers            | 4815  | 115  | 19678  | 1.08 (0.84–1.40) | 0.98 (0.76–1.27) | 0.96 (0.74–1.24) |
| Non-drinkers          | 44725 | 1083 | 178201 | 1.13 (0.93–1.36) | 0.83 (0.67–1.03) | 0.80 (0.65–1.00) |

---

\*Follow-up duration was presented as person-years. †*P* for interaction.

Model 1: adjusted for age and sex

Model 2: adjusted for age, sex, body mass index, smoking status, regular physical activity, low income, CHA<sub>2</sub>DS<sub>2</sub>-VAsC score, hypertension, dyslipidemia, chronic heart failure, peripheral arterial disease, stroke/transit ischemic attack, thromboembolism, the use of insulin, and the number of oral hypoglycemic agents.
